# Supplementary material for: Sensitivity of geodetic glacier mass balance estimation to DEM voidinterpolation
Source: Copernicus journal article supplement (doi:10.5194/tc-2018-175), 2018-10-01
Supplement: Supplementary file [file tc-2018-175-AC2-supplement.pdf]

# Reponse to Reviewer 2

McNabb et al. compare different strategies of filling data gaps or interpolating sparse measurements of glacier elevation change in order to obtain the best estimate of total volume change (and ultimately glacier-wide mass balance). They assess the relative performance of the different gap-filling methods by comparing their results to the true volume change from the complete map of elevation change, an assessment both at the scale of individual glaciers and at the regional scale.

This is a certainly welcome study and I foresee that it is going to be widely cited. Indeed, almost all studies performing geodetic mass balance estimates need to handle data gaps. The procedure to assess the influence of different gap-filling method (i.e. taking a complete map of elevation change  $dh$  and creating realistic data voids in it) is adequate. That said, I was somewhat disappointed by the paper. It is not always clear and the writing could be improved. More importantly, I ended up with some questions that, I think, could have been, at least partly, answered. More work is needed to fully exploit this nice dataset and to transform this good study in a benchmark paper for the community.

We would like to thank the referee for their careful and constructive comments that have helped to improve both the clarity and focus of the manuscript, and we hope our revisions will be satisfactory. Our responses to the comments below are in blue, with the original comments in black.

## 1 General comments

1. Choice of unit to report the results. The authors have chosen to report their total volume change (and their departure from the true value) in  $\text{km}^3$ . I do not find this unit really useful, as it is so much dependent on the glacier area. This is why, most studies use the very convenient unit of  $\text{m w.e. yr}^{-1}$  (or  $\text{kg m}^{-2} \text{yr}^{-1}$ ) to report mass balances. With the latter unit, it is easy to compare different glaciers within a region or glacier mass balance from different regions. I fully understand (and support the fact) that the authors do not want to provide mass balances here because many additional corrections would be required to obtain a meaningful value. Thus, I suggest that they use glacier-wide or region-wide elevation change (thus in meters), together with % of error (as already done).

In accordance with this comment, as well as the comments from another reviewer, we have re-presented the analysis using  $\text{m a}^{-1}$ , that is, the area-averaged rate of volume change.

2. How to handle data gaps in the error estimate. A missing section/discussion is how to take into account the data gaps in the formal error estimate. Right now, authors performed a sound sensitivity analysis and conclude on the best strategies, which is already useful. However, a remaining question is how to include the uncertainties dues to data gaps in the formal error estimate. I do not think this is done well in the literature so far and I was hoping to find an

answer here. Authors would increase the impact of their work if they could provide, at least, some suggestions. I know this is not straightforward but really hope they can tackle this issue.

We agree, both that this is not done particularly well in the literature, and that this would be a very good addition to the literature. Unfortunately, we are unable to include a correct, formal handling of the uncertainty introduced by data gaps, but rather provide insight into the magnitude of the potential error given a certain void percentage. We hope that the improved section 4.5 and Figs. 10-12 in the updated manuscript provide some useful insight on this topic. The formal handling of this error must somehow include also the ability to guess at the missing changes, and will depend strongly upon each individual dataset. For example, a dataset with a few random measurements over a geometrically simple accumulation area may be less uncertain than over a more complex accumulation area with multiple basins where both accumulation and dynamics will be spatially varying. Therefore, also at this point in time, we are not sure how to best formulate an extrapolation error equation for data gaps.

3. % of data gaps. The gap creating method makes sense. However, I had the feeling that the % of data gaps was not very high and the data voids not large. Are these percentages of data gaps in line with published values? A more aggressive gap creating threshold is discussed, but too briefly. How much data gaps are created in this case? I think many readers would be curious to know if the conclusions hold when 50% (or more) of data gaps are present.

In the updated manuscript, section 4.5, we have gone into much greater detail, using multiple correlation thresholds to analyze the differences for individual glaciers. In particular, we examine the performance vs. percent void for the best-performing methods chosen based on the 50% threshold case.

4. Variability of  $dh$  in the study region. I miss a more thorough description of this variability. This is important here because in an end-member case (hypothetic) where there would be no spatial variability of elevation change, then most gap-filling methods would work well. How does variability vary with elevation? I expect less  $dh$  variability at high elevations where data gaps tend to be concentrated, which may explain why the local hypsometric approach works well. To quantify variability, individual glacier mean elevation change (not glacier-wide mass balance) could be calculated and the spread shown. How does this spread compare to earlier studies? It would also help to discuss whether the study region is representative.

This is a welcome suggestion, and we have included this discussion in its own section, 4.2, which looks at both the variability within the region and compared other published values. This part of Alaska seems to be somewhere in the middle of values for regions including other parts of Alaska, the Arctic, and High Mountain Asia. Fig. 3 in the text shows the variability within (normalized) elevation bands, which confirms your expectations here - less variability at higher elevations, higher variability at lower elevations.

5. Global hypsometric approach, normalized elevations or not? To take into account the diversity of the altitude range of glaciers in a region, some earlier studies have normalized the elevation in order to extrapolate to un-surveyed areas. This is also what the authors do here to plot  $dh$  in their Figure 3. I was wondering if the normalization helped or not for the extrapolation. This procedure seems to make sense and it would be good to test its added value.

Other studies, such as Arendt and others (2006), have looked into this with more detail. We discuss this point in more detail at 9.31-10.2, indicating estimates may be improved for individual glaciers

by using the normalized elevations; however, we obtained good results using absolute elevation changes with the global mean hypsometric method, which may indicate that it is not needed.

## 2 Specific comments

- 1.1 mass balance does not imply sea level. Glacier mass gain/loss does.

Changed.

- 1.2 Mentioning glaciological measurements in the abstract is not really useful. Not the core of the paper.

Removed this sentence, replaced with “Recently, glacier mass balance has been estimated on individual glacier and regional scales using repeat, full-coverage digital elevation models (DEMs).”

- 1.5. Is “based” the best word here?

Changed to read “the properties of which depend on...”

- 1.18. One further and strong important limitation of the glaciological mass balances is that they seem to be performed on glaciers where the mass balances tend to be more negative than the regional average (Gardner et al., Science, 2013).

Indeed, and we have added a sentence here to reflect this.

- 1.20 They must be a reference for the WGMS data and also for the number of glaciers on Earth

RGI reference added for the number, and WGMS reference added.

- 1.22 A reference to a review? Possibilities I see are:

- Bamber, J. L. and Rivera, A.: A review of remote sensing methods for glacier mass balance determination, *Global and Planetary Change*, 59(14), 138148, doi:10.1016/j.gloplacha.2006.11.031, 2007.
- Bamber, J. L., Westaway, R. M., Marzeion, B. and Wouters, B.: The land ice contribution to sea level during the satellite era, *Environmental Research Letters*, 13(6), 063008, 2018.
- Marzeion, B., Champollion, N., Haeberli, W., Langley, K., Leclercq, P. and Paul, F.: Observation-Based Estimates of Global Glacier Mass Change and Its Contribution to Sea-Level Change, *Surveys in Geophysics*, 38(1), 105130, doi:10.1007/s10712-016-9394-y, 2017.

We have included a reference to Bamber and Rivera (2007) here.

- 1.25. Do the authors exclude from the geodetic method (and thus from the study) all ICESat-based estimates of glacier volume change? ICESat provides sparse measurements that need extrapolation. To be clarified.

Added a parenthetical statement to make clear that we aren’t excluding laser altimetry/ICESat studies from the ‘geodetic’ label.

- 2.6. Acronym DEMs to be used here, as defined already. Do the authors understate that they exclude estimate based on ICESat or sparse GPS surveys?

It was not our intent to exclude ICESat surveys from this consideration, and we have updated the text accordingly.

- 2.9 Maybe a short statement that this is certainly true for old imagery (8-bits) but that this issue is strongly reduced using state-of-the-art 11- or 12-bits stereo data? In the end, I also note that the data gaps are not so concentrated in the accumulation area.

added “though this problem has been reduced with improved radiometric resolution of more modern sensors.” to the end of this sentence.

- 2.25 I think the interpolation methods should be described only once but not “briefly”. They are the heart of the study.

The methods are described in more detail in the actual body of the paper, but we feel that a brief summary is appropriate here.

- 2.28. Does it make a difference that the elevation with altitude is used to fill unsurveyed values vs. just multiplied by the area of the altitude band? For the glacier-wide mass balance (or the glacier-wide dh) I think it is the same. Maybe state it to avoid confusion for some readers.

Changed to read “and estimating elevation change as a function of elevation, integrating this curve with the glacier hypsometry”, as the practical difference between the two approaches is at most very small.

- 2.30 I very strongly suggest using regional instead of global. I found global confusing (I immediately thought about the whole Earth). Or did I miss a difficulty linked to the use of “regional”?

We have chosen to use “global” and “local” terminology based on the same terms used in “global” and “local” methods of interpolation. In the former, a single function is used to interpolate over the domain of a dataset, whereas in the latter, the function chosen changes based on the properties of a subset of the data. We have now stated this in the text.

- 2.31 “basin” needed after “glacier”?

Removed, and elsewhere.

- 2.35 The sentence “In this paper, we use two high-quality, radar-derived DEMs.” does not appear to be complete and break the flow of the introduction.

We have moved this sentence to the end of the paragraph, and added more information about how we perform the study.

- 3.14. I think the key point for this study is that the authors have a large intra-glacier and inter-glacier variability of elevation change (a consequence of the variety of glacier type). Make it clear and quantify better (see general comments). The authors may note that some previous workers have separated different glacier types while extrapolating.

Sentence changed to read “As such, it is an ideal region to estimate the effects of using spatially incomplete DEMs to estimate glacier volume changes, as it provides a diverse sample of glacier types, sizes, and altitude ranges, with a high variability of intra- and inter-glacier elevation changes.”

- 3.24. % of data gaps in SRTM for this study area?

Fewer than 2.5% for the glacierized area; we have added this information here.

- 4.26 Could also have been done on the SRTM. Maybe state that this is an arbitrary choice.

True, and stated.

- 5.3 How did the authors handle clouds in ASTER?

ASTER scenes were chosen based on being mostly cloud-free over glaciers. If clouds were present in the images over glaciers, this is reflected in low correlation scores.

- 5.9 As said before, description of each interpolation method is central to the study. So we do not want to have a "brief summary" only. In fact the description is detailed enough.

Removed "brief" from this sentence.

- 5.14 Here and elsewhere I found the use of "glacier basin" instead of "glacier" a bit problematic. For me a glacier basin includes the glacier + the off-glacier terrain included in this basin. Why not using "glacier" simply ? (everywhere)

To reduce confusion, we have removed references to 'glacier basins' throughout the paper, and replaced with either 'glacier outline' or simply 'glacier'.

- 5.22 "linear interpolation". Should not it be "bilinear"?

Yes, it should be.

- 5.22 "because the voids are relatively small" is not a very precise statement. It lack quantification (void size?) and one also would like this study to address the case of large data voids.

We have removed this statement.

- 6.8 is 'original elevation' clear enough?

Changed to "elevation in the earliest DEM"

- 6.27. IMPORTANT. I see no reason why the systematic error in elevation difference ( $\epsilon_{\text{bias}}$ ) obtained using triangulation between the DEMs should be divided by the square root of the number of effectively independent pixels. Either justify or correct.

Thank you for catching this typ-o. We have fixed this equation and the following one.

- 7.8 I would have expected a higher percentage of voids in the accumulation area. This is not the case. This should be discussed.

It is actually the case, though. The bulk of the area-altitude distribution corresponds to the relatively flat, mostly featureless portions of the accumulation areas, while higher elevations tend to be on much steeper slopes where there is more contrast in the ASTER scenes (which leads to higher correlations).

- 7.14 title of section 4.2 is not really meaningful. Improve section and sub-section titles if possible.

Changed to "Impacts on Individual Glacier Estimates"; changed 4.3 to "Impacts on Regional Total"

- 7.16. An elevation change can be negative, not a pattern.

Changed to read "elevation changes in the region are negative, especially at lower elevations."

- 7.21 "The pattern of elevation change shown on Rendu Glacier in the elevation difference maps". Authors need to improve the text.

replaced "the elevation difference maps" with "Fig. 4"

- 7.26 to 8.2. These sentences are not really well written and the reasoning is hard to follow. In fact, I do not see the rational for using volume change in  $\text{km}^3$  (and quoting an average volume change). This unit is so much dependent on the size of the glaciers whereas the global hypso method consist (if I understood correctly) in using mean/median dh per elevation band. So if a glacier (whatever his size) as a dh vs. altitude pattern like the rest of the region then the method should work.

We have updated the text to use units of  $\text{m a}^{-1}$ , and indicated the variability in glacier elevation changes as suggested previously.

- 8.4 the fact that the authors do the conversion here to average elevation change (in meter), nicely illustrates the limit of the total volume approach (in  $\text{km}^3$ ).

We have removed this paragraph.

- 8.7. IMPORTANT. The fact that the authors interpolate "over much smaller areas" (and the authors are aware of that) is quite problematic. It suggests that the authors are in a configuration (with sparse data voids) where local gap filling methods will all perform reasonably well. A much more aggressive gap creating strategy should be considered in an alternative scenario.

Kääb (2008) used contour lines, and differences at contour lines, to interpolate a DEM, hence our use of "much smaller areas". We have removed this paragraph in the updated text, and greatly expanded the discussion and analysis in section 4.5 to show much more aggressive cases.

- 8.8-10. I do not follow the reasoning. Contour lines are maybe (certainly) biased at high elevation but a DEM created from them does not have data gaps. So the fact that contour line is floating is a different problem (like radar penetration) and does not influence the errors due to gap filling. Or better explain if I missed something.

As above, we have removed this paragraph.

- 8.30 Showing the dh with altitude for each of these 20 glaciers and the regional mean value would nicely illustrate the text.

Thank you for the suggestion. With the number of figures we have, we feel that it would not be an effective use of space to show this here as well.

- 9.11 Did authors used the term "global fits" before. I do not think so. If they want the readers to follow them, then they need to stick to a terminology.

Changed to use "methods", in line with the previous terminology.

- 9.22 "Differences" of what?

Differences to true values. Text updated.

- 9.26 authors need to clarify "relative". Is it normalized? If yes, I think they should quantify the added value of the normalization for the same global mean hypsometri method.

Updated text to use 'normalized' in place of 'relative'.

- 9.30 "one explanation for the value". Do the authors want to discuss a high/low value? Clarify. Did they expect this method to perform better? Avoid such understatements.

Changed to read "the overall worse performance of the elevation interpolation method versus linear interpolation of elevation change", as this is the comparison we intended to make.

- 10.9 do the authors suggest using the median rather than the mean as a metric of centrality for an elevation bin? I think it could be dangerous because the dh distribution could also be quite skewed with an elevation bin (when it comes to large glaciers for example). At least this needs to be discussed.

We suggest that using the median for an elevation is less bad than using the median for an entire glacier; that said, it clearly does not do as well based on our results. We have added a sentence at the end of this paragraph to clarify this point.

- 10.11 Authors need to provide the corresponding % of data gaps? Does this more aggressive threshold really lead to a strong increase in data gaps? Where on the glacier?

Please see the updated text, which discusses these issues in much greater detail.

- 10.22 Authors should detail how the ASTER DEMs were derived. Depending on the methods (and correlation threshold) the percentage of data gaps will change quite a lot. The following question is thus raised: Is it better to keep only the most reliable values in the DEM and increase data gaps (and filled them afterward) or alternatively try to get the DEM processing parameters resulting in the most complete DEM. If the authors could also contribute to this research question they would increase the impact of their study.

We have added more details to this paragraph, and attempted to answer the bigger question at the end of this section.

- 10.25 was dDEM defined already? (not sure)

Yes, at 5.24.

- 10.29 Is this value of 0 km<sup>3</sup> the volume change estimate, suggesting surprisingly no volume change? Or the difference to the true IfSAR/SRTM value?

This is the volume change estimate, not the comparison to the “true” value. We have added ‘total’ to this sentence to help clarify this point.

- 10.31 ”3.6” positive value of volume change? OK?

That’s the value that we get, yes.

- 11.1 surprising statement that the two methods perform as well when authors just illustrated the danger of the linear interpolation method...

Added ‘in the idealized case presented here’ to clarify.

- 11.25 the dependence on the size of the voids has unfortunately not been examined sufficiently.

We hope that the updated section 4.5 is sufficient.

- 11.30 I do not think this issue of proximity has been really addressed so that such a conclusion can be made. Or I misunderstood the statement? Do the authors suggest using a modified global method using only the glaciers in the vicinity of the one for which volume change needs to be calculated?

This statement covers the local hypsometric methods, as well as the spatial interpolation methods, which use values either from a given glacier, or from areas within a small area around the glacier in the case of glacier complexes. We have clarified this in the text.



- 11.33 "suffice" well anyway there is no other choice right? If only a few "anomalous" glaciers are sampled than the regional total could be strongly biased

Added a sentence 'Additionally, the regional bias for such a case may be strongly biased, as discussed in previous studies.' to further clarify this point.

- Table 1. Can the authors tell if these are simple (as I guess) or area-weighted statistics? Maybe remind in the legend the number of individual glaciers on which these statistics are obtained.

These are not area-weighted statistics, but 'simple' statistics as you have guessed. We have included the total number of glaciers in the legend, as suggested.

- Figure 1. I could not find name of glaciers on this figure.

We have increased the font size to make this easier to read.

- Figure 3. What is the envelop around the mean/median dh? 1-sigma of data?

Yes. This is now indicated in the figure caption.

- Figure 2. An extra panel showing the distribution of data gaps for the more aggressive correlation threshold would be welcome. Also provide on each panel the % of data gaps for Taku Glacier.

We have provide the percentage of data gaps for Taku, as suggested, but have not added a panel to the figure.

- Figure 5. The authors use Actual volume change here but true volume change in the text. Homogenize. Are all the acronyms used to name the different methods in the figure defined (in the text or the legend)?

Label change to use "true" instead of "actual." Acronyms are now introduced in section 3.2, and kept consistent throughout the figures and tables.

- Figure 6. Rather than showing the dh maps for all methods (with some maps that are very similar), it would probably be best to show only the ones with strong difference. Also it would be good to show the map with data voids. So that the reader as a good sense of where the voids where. Authors could also consider moving this figure (or the suggested revised version of it) to the supplement. Showing instead the pattern of change with altitude for Taku derived from these maps could likely better illustrate some of the subtle differences mentioned in the text.

By including all maps, even those that look very similar, we illustrate that in some cases, there aren't many differences between the methods investigated. We have included the data voids in panel a, but have otherwise left the figure unchanged.

## References

- Arendt, A. A., K. A. Echelmeyer, W. D. Harrison, C. S. Lingle, S. L. Zirnheld, V. B. Valentine, J. B. Ritchie and M. Druckenmiller, 2006. Updated estimates of glacier volume changes in the western Chugach Mountains, Alaska, and a comparison of regional extrapolation methods, *Journal of Geophysical Research*, **111**(F3).
- Bamber, J. L. and A. Rivera, 2007. A review of remote sensing methods for glacier mass balance determination, *Global and Planetary Change*, **59**(1–4), 138148.



Kääb, A., 2008. Glacier Volume Changes Using ASTER Satellite Stereo and ICESat GLAS Laser Altimetry. A Test Study on Edgeøya, Eastern Svalbard, *IEEE Transactions on Geoscience and Remote Sensing*, **46**(10), 2823–2830.
